# Supplementary material for: Sex Differences in the Association Between Insulin Resistance and Incident Coronary Heart Disease and Stroke Among Blacks Without Diabetes Mellitus: The Jackson Heart Study
Source: PubMed Central journal article supplement — J Am Heart Assoc. 2017 Feb 2;6(2):e004229. doi: 10.1161/JAHA.116.004229 (PMC5523745; doi:10.1161/jaha.116.004229), 2017-02-02
Supplement: JAH3-6-e004229-s001.pdf [file JAH3-6-e004229-s001.pdf]

## SUPPLEMENTAL MATERIAL

**Table S1.** Sensitivity Analysis Displaying Hazard Ratios (95% CI) per Unit SD increase in HOMA-IR and McAuley Index for Ischemic Stroke Events Only.

| Models  | McAuley Index                      | HOMA-IR Index                      |
|---------|------------------------------------|------------------------------------|
|         | Hazard Ratios (95% CI)             |                                    |
|         | (n <sub>events</sub> /N = 59/3555) | (n <sub>events</sub> /N = 59/3555) |
| Model 1 | 0.87 (0.66 – 1.15) <sup>§</sup>    | 1.21 (0.90 – 1.63) <sup>§</sup>    |
| Model 2 | 0.88 (0.65 – 1.18) <sup>§</sup>    | 1.21 (0.88 – 1.67) <sup>§</sup>    |
| Model 3 | 0.89 (0.67 – 1.19) <sup>§</sup>    | 1.22 (0.89 – 1.67) <sup>§</sup>    |

All p not significant. Model 1 was adjusted for age, sex and smoking. Model 2: model 1 plus BMI. Model 3: model 2 plus systolic BP. BMI indicates body mass index; BP, blood pressure; CHD, coronary heart disease; CI, confidence interval; HOMA-IR, homeostasis model assessment for insulin resistance.
